# Supplementary material for: Role of Fimbriae, Flagella and Cellulose on the Attachment of Salmonella Typhimurium ATCC 14028 to Plant Cell Wall Models
Source: PubMed Central journal article supplement (PMC4927157; doi:10.1371/journal.pone.0158311), 2016-06-29
Supplement: pone.0158311.s002.pdf [file pone.0158311.s002.pdf]

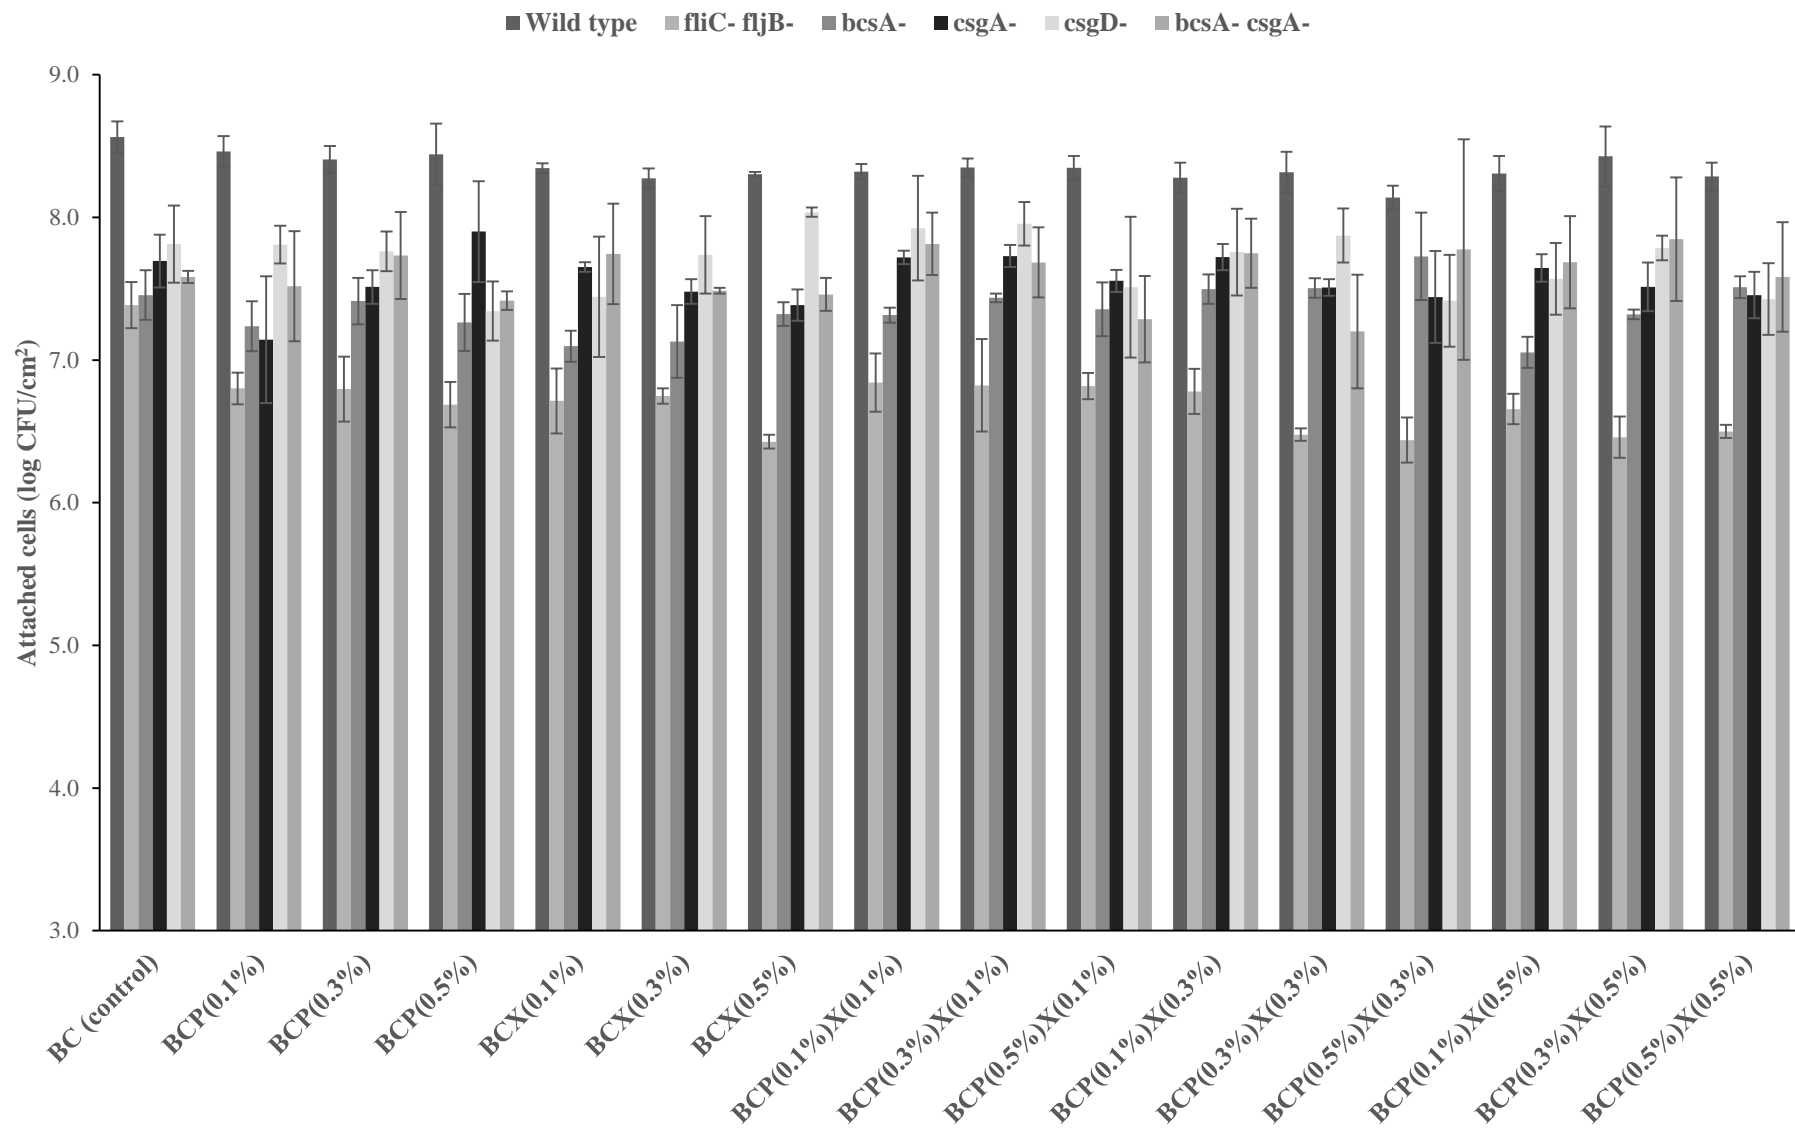

S2 Fig A

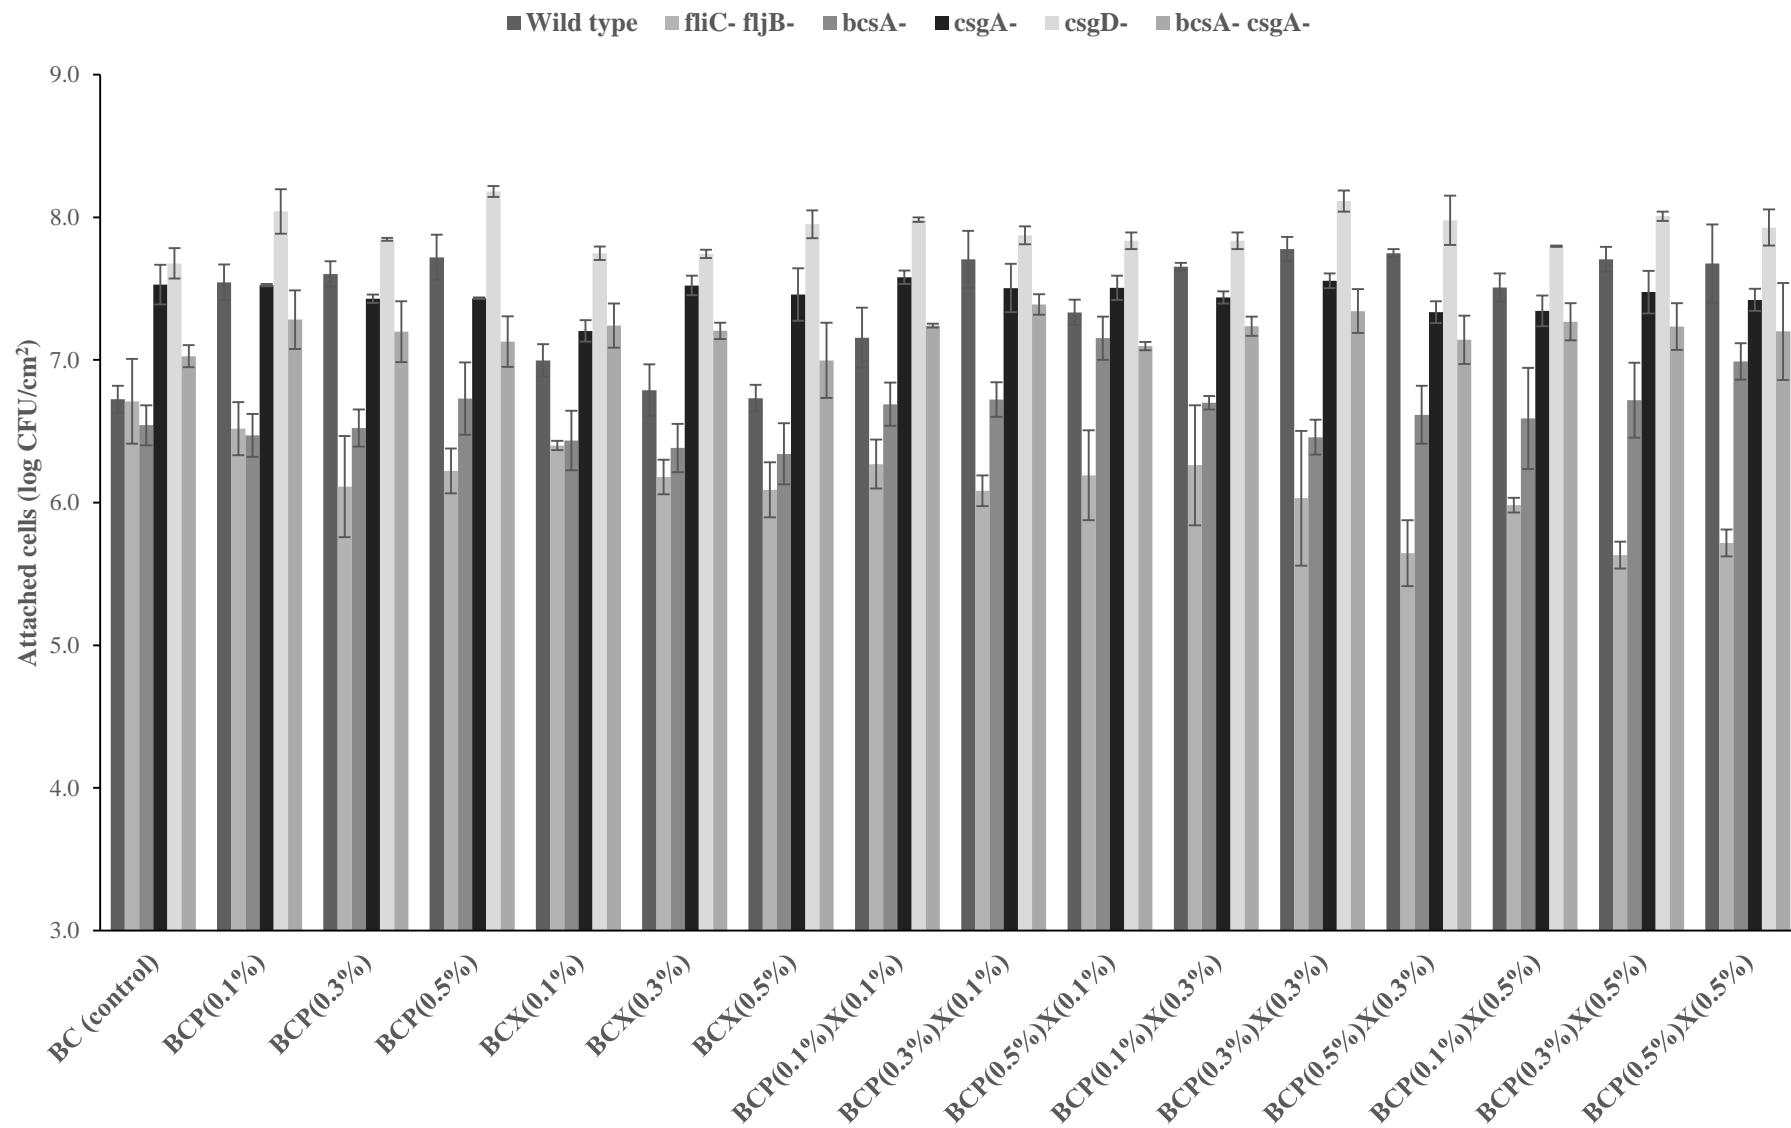

S2 Fig B
